# Supplementary material
Source: PubMed Central journal article supplement (PMC3602764)
Supplement: mmc1.pdf [file mmc1.pdf]

# SUPPORTING MATERIAL

*for*

## The Nature of the Intramolecular Charge Transfer (ICT) State in Peridinin

*Nicole L. Wagner<sup>‡</sup>, Jordan A. Greco<sup>†</sup>, Miriam M. Enriquez<sup>†</sup>,  
Harry A. Frank<sup>†,\*</sup> and Robert R. Birge<sup>‡,†,\*</sup>*

---

<sup>‡</sup>Department of Molecular & Cell Biology, University of Connecticut, Storrs, Connecticut 06269-3125 USA

<sup>†</sup>Department of Chemistry, University of Connecticut, Storrs, Connecticut 06269-3060 USA

\*To whom correspondence should be addressed. Email: [rbirge@uconn.edu](mailto:rbirge@uconn.edu) or [harry.frank@uconn.edu](mailto:harry.frank@uconn.edu); Telephone: 860-486-6721 (RRB) or 860-486-2844 (HAF); Fax: 860-486-2981

## Overview of Supporting Material

This supporting material presents additional figures and tables that are relevant to the main paper. Transient absorption spectra for longer time delays than examined in Fig. 5 of the main paper are shown in Fig. S1. The calculated ground and relaxed excited singlet state geometries of the model chromophore in *n*-hexane and methanol are shown in Fig. S2. The calculated ground and relaxed excited singlet state geometries of the full peridinin chromophore in methanol are shown in Fig. S3. EOM-CCSD calculations for the full peridinin chromophore geometries shown in Fig. S3 are provided in Fig. S4. This figure can be compared to the model chromophore calculations shown in Fig. 6 of the main paper. Analysis of the dipole moment of the full peridinin chromophore in various solvents is presented in Fig. S5.

The cartesian coordinates and Mulliken atomic charges associated with the ground state and the excited state of the model compound in methanol are presented in Tables S1 and S2. The cartesian coordinates and Mulliken atomic charges associated with the ground state and the relaxed excited singlet state of the full peridinin compound in methanol are presented in Tables S3 and S4. The ground state coordinates were generated theoretically by using B3LYP/6-31G(d) methods coupled with solvation methods based on the polarizable continuum model (PCM). The excited state coordinates were generated theoretically by using single-configuration interaction (CIS) methods and a double-zeta D95 basis set. The active space included the highest energy 8 filled molecular orbitals and the lowest energy 8 unfilled molecular orbitals. Additional details may be found in the theoretical section of the main paper.

**Ground and Excited State Dipole Moments.** We calculated the ground state dipole moment of both the model chromophore and the full peridinin chromophore in a variety of solvents by

using density functional theory [B3LYP/6-31G(d)] and self-consistent reaction field theory based on PCM methods (see Theoretical Methods). The results for the full chromophore are plotted in Fig. S5, and two linear regions are observed when the total dipole moment is plotted versus the Onsager dielectric function,

$$P(\epsilon) = 2(\epsilon - 1)/(2\epsilon + 1) \quad (1)$$

where  $\epsilon$  is the dielectric constant, and  $P(\epsilon)$  varies from 0 ( $\epsilon = 1$ , vacuum conditions) to 1 ( $\epsilon = \infty$ ).

At relatively low dielectric constants ( $\epsilon \leq 4$ ), a linear fit to the data yields,

$$\mu_{\epsilon \leq 4} = 5.96 + 2.77P(\epsilon) \quad (2)$$

At dielectric constants above 4, and for polar or very polar molecules, the following relationship holds,

$$\mu_{\epsilon > 4} = 5.29 + 3.85P(\epsilon) \quad (3)$$

As shown in Fig. S5, the linear portions are separated by a kink in the trend line at roughly  $P(\epsilon) \sim 0.6$  ( $\epsilon \sim 4$ ). However, examination of the solvent optimized geometries revealed nothing unusual associated with the transition between regions. It is interesting to note, however, that this is the approximate region at which meaningful populations of the ICT state are observed in the transient absorption spectra (see Fig. 5 noting that modest ICT state formation is observed in methyl-*t*-butyl ether,  $\epsilon \sim 2.6$ ). No experimental measurements of the ground state dipole moment have been reported, but Stark effect studies are consistent with a ground state vacuum value ( $\mu_0$ ) of  $\sim 6$  D (*I*).

Stark measurements on peridinin (2) and modified length analogs of peridinin (*I*) revealed a large increase in the dipole moment of the strongly allowed “ $1^1B_u^+$ ” state relative to the ground state value. However, the two studies did not agree on the magnitude of the dipole

moment change. Premvardhan *et al.*(2) observed ambient temperature solvent dependent values of  $\Delta\mu(^1B_u^+)$  of 22 D in methyl tetrahydrofuran and  $\sim 27$  D in ethylene glycol. Kusumoto *et al.*(1) observed that the value of  $\Delta\mu(^1B_u^+)$  was dependent upon the vibronic band for which the Stark shift was measured, and ranged from 12.9 D near the absorption max to 20.8 D in the lowest energy vibronic band (1). The latter studies were carried out at 77 K in methyl methacrylate polymer. The Stark measurements necessarily reflect changes in dipole moments for the ground state (or Franck-Condon) geometry, and thus should be compared to the  $S_1$  results shown in the left panel of Fig. 8. The SAC-CI calculations predict a  $\Delta\mu(^1B_u^+)$  value of 15 D, which is smaller than the value reported by Premvardhan *et al.*(2), but is in excellent agreement with the 12.9 D value reported for the band near the Frank-Condon maximum by Kusumoto *et al.*(1) Some of the differences between theory and experiment can be attributed to our use of a model chromophore for the excited state calculations.

The above experimental and theoretical results are to be compared to the results predicted for the change in dipole moment of the ICT state, which is calculated to have a  $\Delta\mu(\text{ICT}) = 21.1$  D relative to a ground state value of 18 D. The total dipole moment of the ICT state is calculated to be 37.7 D, which is remarkable, even for a charge transfer state. The low energy of the ICT state in polar compounds is due in large part to the interaction of this dipole moment with the reaction field of the solvent. The rapid formation of the ICT state ( $\sim 100$  fs, see Fig. 5 and previous discussion) is facilitated by the close alignment of the ground and  $S_1(\text{ICT})$  states dipole moments (compare the two lower right panels in Fig. 8).

The dipole moments of the excited singlet states other than the “ $^1B_u^+$ ” and ICT states are all less than 10 D and, in the case of the second and third excited singlet state, are in roughly the opposite direction of the ground state dipole moment.

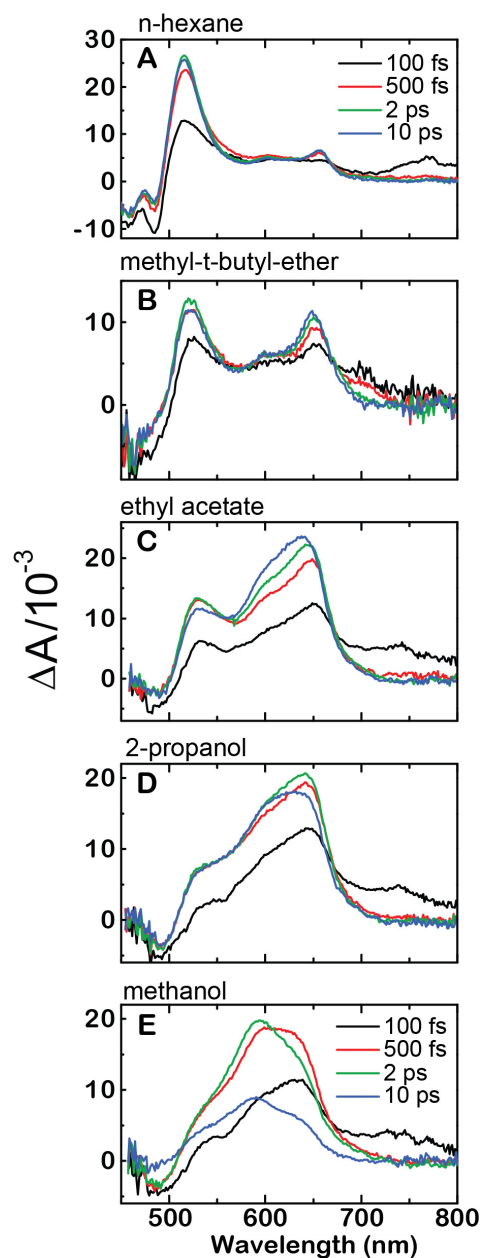

**Figure S1.** Transient absorption spectra of peridinin taken at different time delays upon excitation at 485 nm in *n*-hexane (A), methyl-*t*-butyl ether (B), ethyl acetate (C), 2-propanol (D), and methanol (E). The line colors reflect different time delays as shown in the two identical inserts, duplicated for reader convenience. See Figure 4 in the main paper for the shorter time delays showing the formation time of the ICT state in higher temporal resolution.

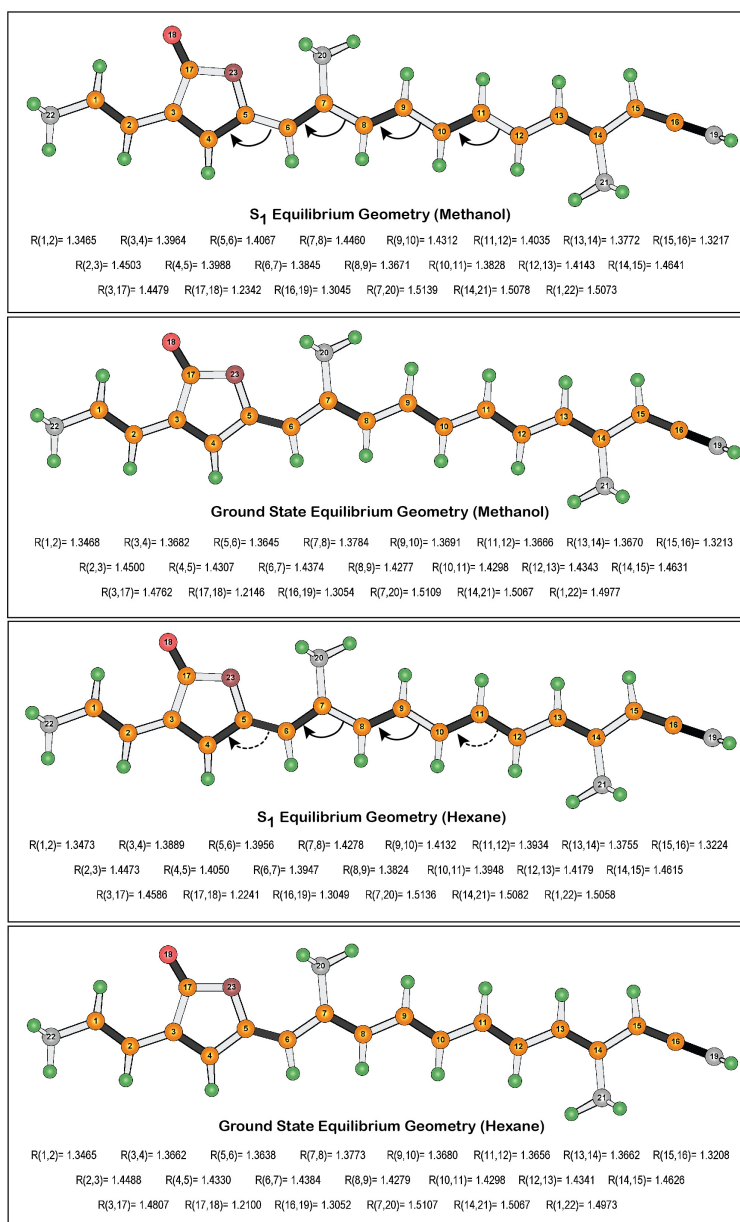

**Figure S2.** Geometries calculated for the ground and lowest excited relaxed singlet states of the peridinin model compound in *n*-hexane and methanol. The ground state geometries were calculated using B3LYP/6-31G(d) density functional methods. The relaxed excited singlet geometry was calculated using single-configuration interaction (CIS) methods and an active space of the highest energy 8 filled and lowest energy 8 virtual molecular orbitals. The coordinates and Mulliken atomic charges for the two structures in methanol are presented in Tables S1 (ground) and S2 (S<sub>1</sub> relaxed geometry).

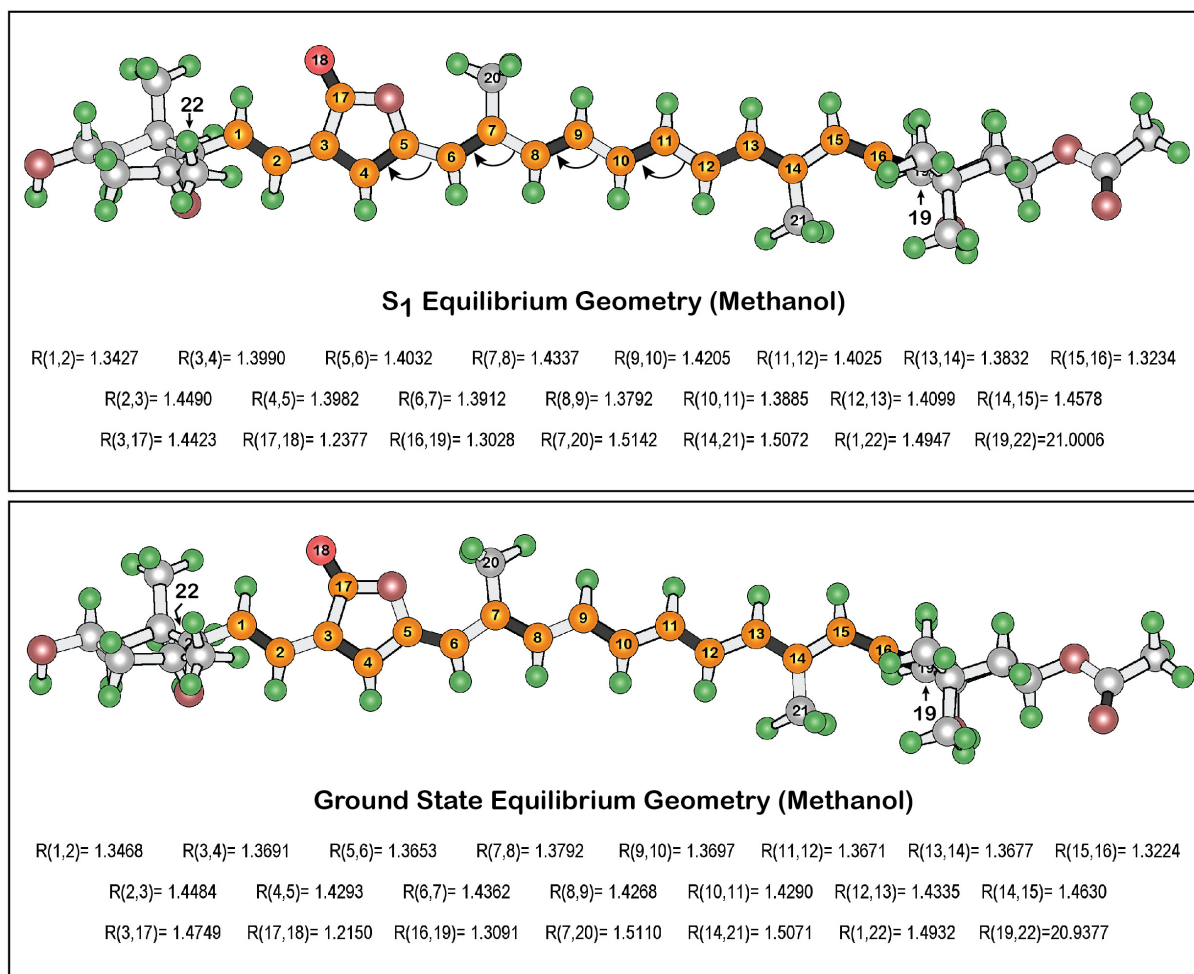

**Figure S3.** Geometries calculated for the ground and lowest excited relaxed singlet states of peridinin in methanol. The ground state geometries were calculated using B3LYP/6-31G(d) density functional methods. The relaxed excited singlet geometry was calculated using single-configuration interaction (Hartree-Fock CIS) methods and an active space of the highest energy 8 filled and lowest energy 8 virtual molecular orbitals. The coordinates and Mulliken atomic charges for the above structures are presented in Tables S3 (ground) and S4 (S<sub>1</sub> relaxed geometry).

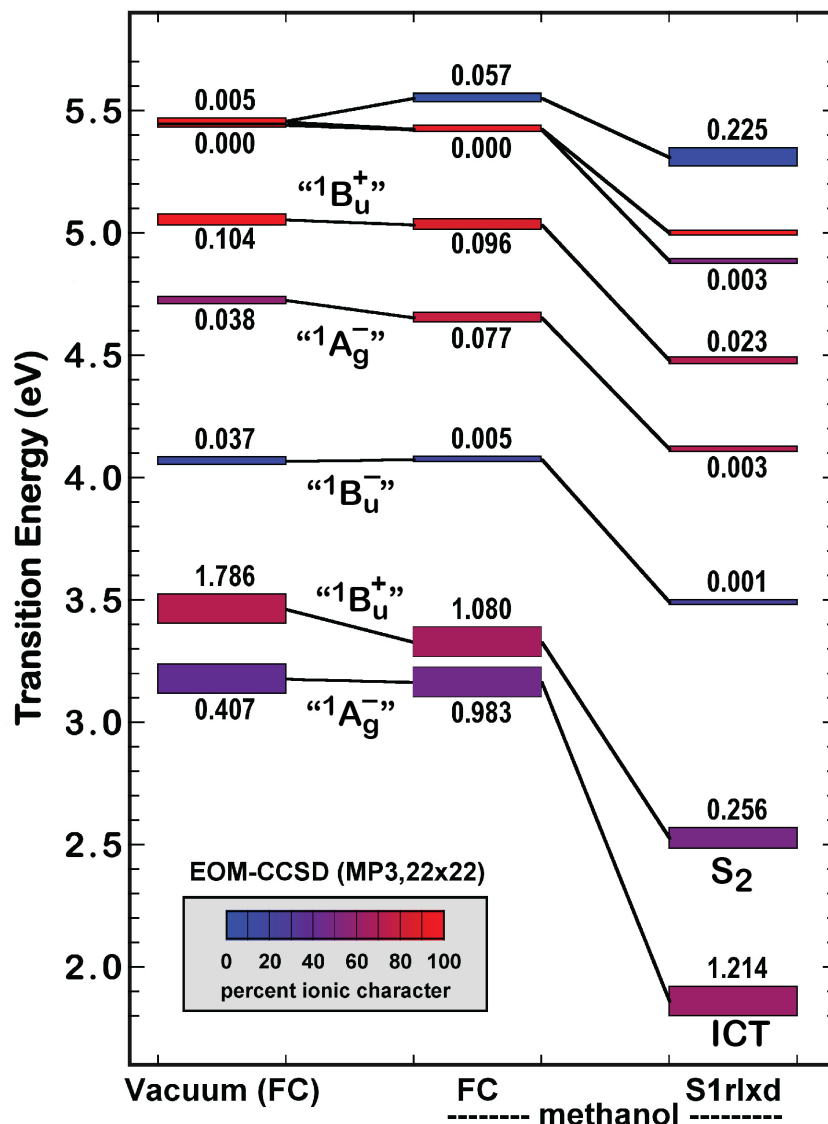

**Figure S4.** Effect of solvent environment on the lowest excited Franck-Condon (FC) and relaxed (S1 rlxd) singlet states of the full peridinin chromophore (Fig. S2) in methanol based on EOM-CCSD procedures. The results for a vacuum calculation (no solvent) are shown in the left column. Transition energies are relative to the ground state. These calculations were carried out with a reduced active space compared to the vacuum result for the EOM-CCSD calculation of Fig. 4 (main paper), and thus the transition energies and oscillator strengths differ slightly. The reduced active space was used to permit the use of PCM solvation for the methanol calculations.



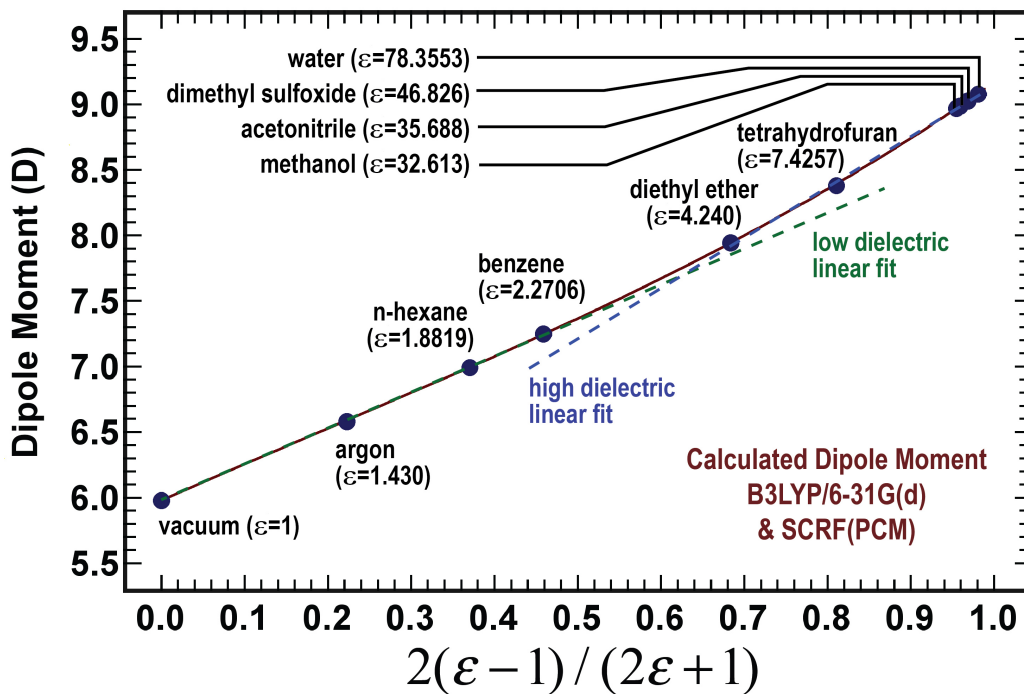

**Figure S5.** Ground state dipole moments of peridinin as a function of Onsager dielectric function, which spans from 0 (vacuum) to 1 (infinite dielectric constant). The results were calculated by using B3LYP/6-31G(d) density functional theory coupled with self-consistent reaction field methods based on PCM methods (see theoretical).

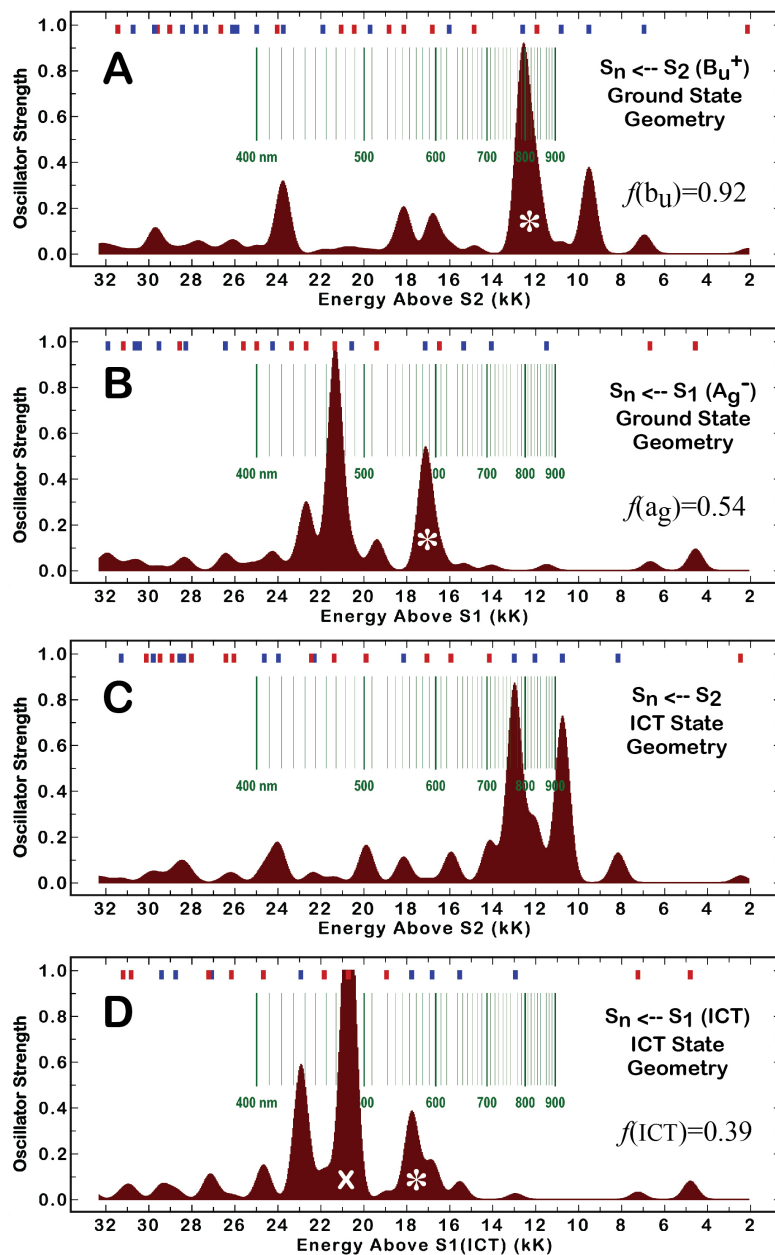

**Figure S6.** MNDO-PSDCI analysis of the  $S_1 \rightarrow S_n$  and  $S_2 \rightarrow S_n$  transient absorption spectra in vacuum. The data are plotted using an artificially narrow Gaussian bands of width 300  $\text{cm}^{-1}$  the height of which is equal to the oscillator strength of the transition. Calculations A and B were carried out using the ground state geometry and calculations C and D were carried out using the ICT excited state geometry.

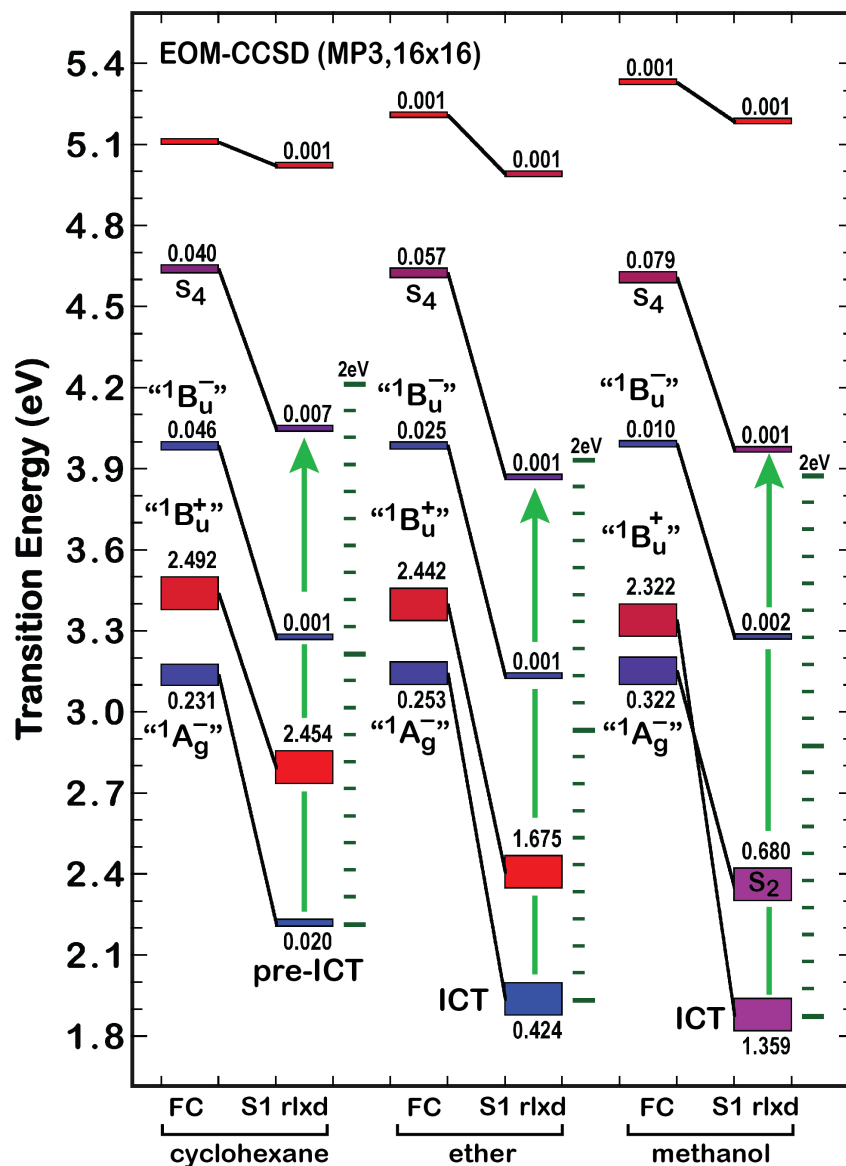

**Figure S7.** Analysis of the S<sub>1</sub>(relaxed) → S<sub>n</sub> transient absorption maximum as a function of solvent environment based on EOM-CCSD calculations. This event is observed in all solvents despite the fact that the ICT state is viewed to be too polar to form in nonpolar solvents. The lowest excited singlet state does relax in all solvents, however, and has an energy and electronic properties that provide for an observable S<sub>1</sub>(relaxed) → S<sub>n</sub> transition. The transient absorption event assigned to the ICT state (Fig. 5, main paper) is observed to blue shift with increasing solvent polarity. The above results predict such a shift (note the green arrows, and the scale shown to the right of the relaxed excited singlet state).

**Table S1.** Cartesian Coordinates and Mulliken Atomic Charges of the Ground State of the Peridinin Model Compound in Methanol (see text).

| Atom | X(Å)       | Y(Å)      | Z(Å)      | Mulliken Charge |
|------|------------|-----------|-----------|-----------------|
| C01  | -8.857381  | 0.346408  | 0.000000  | -0.109052       |
| C02  | -7.757199  | -0.430375 | 0.000000  | -0.175175       |
| C03  | -6.383861  | 0.034867  | 0.000000  | 0.056332        |
| C04  | -5.240101  | -0.716051 | 0.000000  | -0.223483       |
| C05  | -4.102843  | 0.152099  | 0.000000  | 0.366756        |
| C06  | -2.781016  | -0.186458 | 0.000000  | -0.269239       |
| C07  | -1.606549  | 0.642302  | 0.000000  | 0.165135        |
| C08  | -0.392079  | -0.009709 | 0.000000  | -0.192538       |
| C09  | 0.915465   | 0.563570  | 0.000000  | -0.145188       |
| C10  | 2.057080   | -0.192124 | 0.000000  | -0.131736       |
| C11  | 3.382249   | 0.344845  | 0.000000  | -0.140246       |
| C12  | 4.513868   | -0.421250 | 0.000000  | -0.137588       |
| C13  | 5.840021   | 0.125112  | 0.000000  | -0.200254       |
| C14  | 7.022497   | -0.560857 | 0.000000  | 0.180933        |
| C15  | 8.266543   | 0.209180  | 0.000000  | -0.354188       |
| C16  | 9.485617   | -0.300317 | 0.000000  | 0.321623        |
| C17  | -5.951591  | 1.446345  | 0.000000  | 0.574804        |
| O18  | -6.577006  | 2.487563  | 0.000000  | -0.521260       |
| C19  | 10.696394  | -0.788137 | 0.000000  | -0.562002       |
| C20  | -1.733762  | 2.147874  | 0.000000  | -0.523776       |
| C21  | 7.138104   | -2.063155 | 0.000000  | -0.535717       |
| C22  | -10.259114 | -0.180965 | 0.000000  | -0.499447       |
| O23  | -4.559504  | 1.462941  | 0.000000  | -0.532569       |
| H24  | -8.736908  | 1.427115  | -0.050000 | 0.159463        |
| H25  | -7.876119  | -1.514150 | -0.050000 | 0.142798        |
| H26  | -5.170969  | -1.797096 | -0.050000 | 0.183707        |
| H27  | -2.607979  | -1.260526 | -0.050000 | 0.166567        |
| H28  | -0.420421  | -1.099732 | -0.050000 | 0.146480        |
| H29  | 1.020345   | 1.646350  | -0.050000 | 0.149334        |
| H30  | 1.962472   | -1.278935 | -0.050000 | 0.147140        |
| H31  | 3.481971   | 1.430937  | -0.050000 | 0.144231        |
| H32  | 4.394285   | -1.503017 | -0.050000 | 0.148661        |
| H33  | 5.898842   | 1.214045  | -0.050000 | 0.140114        |
| H34  | 8.167521   | 1.295964  | -0.050000 | 0.171066        |
| H35  | -2.290007  | 2.494007  | 0.827766  | 0.173277        |
| H36  | -2.290007  | 2.494007  | -0.927766 | 0.173277        |
| H37  | -0.760946  | 2.641801  | -0.050000 | 0.163832        |
| H38  | 7.697943   | -2.405728 | 0.829120  | 0.171769        |
| H39  | 7.697943   | -2.405728 | -0.929120 | 0.171769        |
| H40  | 6.168758   | -2.563582 | -0.050000 | 0.169099        |
| H41  | 11.229153  | -1.002880 | -0.976312 | 0.183664        |
| H42  | 11.229153  | -1.002880 | 0.876312  | 0.183664        |
| H43  | -10.283382 | -1.275782 | -0.050000 | 0.162226        |
| H44  | -10.813739 | 0.176051  | -0.928752 | 0.167870        |
| H45  | -10.813739 | 0.176051  | 0.828752  | 0.167870        |

**Table S2.** Cartesian Coordinates and Mulliken Atomic Charges of the Relaxed Excited Singlet State of the Peridinin Model Compound in Methanol (see text).

| Atom | X(Å)       | Y(Å)      | Z(Å)      | Mulliken Charge |
|------|------------|-----------|-----------|-----------------|
| C01  | -8.884788  | 0.570023  | 0.000000  | -0.173447       |
| C02  | -7.807427  | -0.237707 | 0.000000  | -0.300926       |
| C03  | -6.413844  | 0.163853  | 0.000000  | 0.102802        |
| C04  | -5.300606  | -0.679191 | 0.000000  | -0.440782       |
| C05  | -4.131238  | 0.088347  | 0.000000  | 0.466874        |
| C06  | -2.784098  | -0.316565 | 0.000000  | -0.459478       |
| C07  | -1.637113  | 0.458934  | 0.000000  | 0.417760        |
| C08  | -0.371078  | -0.239603 | 0.000000  | -0.344116       |
| C09  | 0.875728   | 0.321105  | 0.000000  | -0.145647       |
| C10  | 2.088343   | -0.439032 | 0.000000  | -0.239116       |
| C11  | 3.338862   | 0.151280  | 0.000000  | -0.179607       |
| C12  | 4.543751   | -0.568566 | 0.000000  | -0.180662       |
| C13  | 5.809465   | 0.062569  | 0.000000  | -0.316470       |
| C14  | 7.038588   | -0.558618 | 0.000000  | 0.386659        |
| C15  | 8.228716   | 0.294066  | 0.000000  | -0.317867       |
| C16  | 9.475907   | -0.143292 | 0.000000  | 0.052502        |
| C17  | -5.908026  | 1.520496  | 0.000000  | 0.401498        |
| O18  | -6.451885  | 2.628443  | 0.000000  | -0.509026       |
| C19  | 10.716474  | -0.546762 | 0.000000  | -0.513460       |
| C20  | -1.692345  | 1.971830  | 0.000000  | -0.672219       |
| C21  | 7.240949   | -2.052785 | 0.000000  | -0.694077       |
| C22  | -10.308422 | 0.074764  | 0.000000  | -0.637248       |
| O23  | -4.512132  | 1.430126  | 0.000000  | -0.551777       |
| H24  | -8.749940  | 1.635441  | -0.050000 | 0.232222        |
| H25  | -7.966428  | -1.302737 | -0.050000 | 0.223146        |
| H26  | -5.319072  | -1.746448 | -0.050000 | 0.268526        |
| H27  | -2.660950  | -1.383120 | -0.050000 | 0.239327        |
| H28  | -0.431628  | -1.313428 | -0.050000 | 0.221472        |
| H29  | 0.989347   | 1.388449  | -0.050000 | 0.210487        |
| H30  | 2.013591   | -1.511754 | -0.050000 | 0.227918        |
| H31  | 3.397000   | 1.225827  | -0.050000 | 0.221075        |
| H32  | 4.482269   | -1.639490 | -0.050000 | 0.222770        |
| H33  | 5.803375   | 1.137958  | -0.050000 | 0.227348        |
| H34  | 8.067357   | 1.357409  | -0.050000 | 0.246671        |
| H35  | -2.227648  | 2.331410  | 0.818368  | 0.216069        |
| H36  | -2.227648  | 2.331410  | -0.918368 | 0.216069        |
| H37  | -0.712140  | 2.417905  | -0.050000 | 0.191657        |
| H38  | 7.810767   | -2.353579 | 0.822302  | 0.213851        |
| H39  | 7.810767   | -2.353579 | -0.922302 | 0.213851        |
| H40  | 6.314175   | -2.602131 | -0.050000 | 0.210019        |
| H41  | 11.248183  | -0.721380 | -0.968287 | 0.236542        |
| H42  | 11.248183  | -0.721380 | 0.868287  | 0.236542        |
| H43  | -10.356432 | -1.007517 | -0.050000 | 0.186639        |
| H44  | -10.843453 | 0.438510  | -0.922628 | 0.192813        |
| H45  | -10.843453 | 0.438510  | 0.822628  | 0.192813        |

**Table S3.** Cartesian Coordinates and Mulliken Atomic Charges of the Ground State of Peridinin in Methanol (see text).

| Atom | X(Å)       | Y(Å)      | Z(Å)      | Mulliken Charge |
|------|------------|-----------|-----------|-----------------|
| C01  | -10.067420 | 0.717369  | 0.030370  | -0.199398       |
| C02  | -8.971288  | -0.065150 | 0.041882  | -0.168848       |
| C03  | -7.601222  | 0.396805  | -0.043369 | 0.058653        |
| C04  | -6.457292  | -0.355449 | -0.038150 | -0.221210       |
| C05  | -5.323455  | 0.509338  | -0.134937 | 0.363811        |
| C06  | -4.000924  | 0.170601  | -0.153659 | -0.265969       |
| C07  | -2.829380  | 0.997453  | -0.234589 | 0.164044        |
| C08  | -1.614173  | 0.345366  | -0.219614 | -0.190565       |
| C09  | -0.307524  | 0.915978  | -0.271890 | -0.145916       |
| C10  | 0.833195   | 0.158491  | -0.240952 | -0.130435       |
| C11  | 2.159328   | 0.689934  | -0.274264 | -0.141191       |
| C12  | 3.287429   | -0.081104 | -0.231455 | -0.135966       |
| C13  | 4.616709   | 0.455171  | -0.245856 | -0.198064       |
| C14  | 5.793000   | -0.240485 | -0.191496 | 0.180689        |
| C15  | 7.044876   | 0.516640  | -0.189566 | -0.407804       |
| C16  | 8.257173   | -0.009336 | -0.141617 | 0.242399        |
| C17  | -7.171942  | 1.803668  | -0.152537 | 0.580092        |
| O18  | -7.800147  | 2.842679  | -0.198893 | -0.523088       |
| C19  | 9.462676   | -0.517180 | -0.090222 | -0.065413       |
| C20  | -2.958041  | 2.500265  | -0.324301 | -0.523598       |
| C21  | 5.890315   | -1.742443 | -0.114222 | -0.540786       |
| C22  | -11.462199 | 0.188909  | 0.101698  | 0.265280        |
| O23  | -5.781465  | 1.818445  | -0.203643 | -0.533184       |
| C24  | -12.045844 | -0.222519 | 1.422133  | 0.287573        |
| O25  | -11.570947 | -1.203489 | 0.460849  | -0.537050       |
| C26  | -11.243086 | -0.149770 | 2.704260  | -0.496893       |
| C27  | -13.557523 | -0.257777 | 1.640985  | -0.315986       |
| C28  | -14.391088 | 0.378613  | 0.522696  | 0.129645        |
| C29  | -13.812650 | 0.050664  | -0.851347 | -0.298688       |
| C30  | -12.387755 | 0.616913  | -1.066828 | 0.058452        |
| C31  | -11.829323 | 0.037927  | -2.382716 | -0.462296       |
| O32  | -15.769228 | 0.004815  | 0.631393  | -0.665630       |
| C33  | 10.211791  | -0.857374 | -1.397264 | 0.265044        |
| C34  | 9.529529   | -0.285374 | -2.644837 | -0.471354       |
| O35  | 10.208039  | -2.300720 | -1.479672 | -0.657006       |
| C36  | 11.666402  | -0.344404 | -1.317591 | -0.306045       |
| C37  | 12.367805  | -0.820327 | -0.054080 | 0.126479        |
| C38  | 11.634180  | -0.337732 | 1.192960  | -0.289191       |
| C39  | 10.157371  | -0.808738 | 1.264172  | 0.054876        |
| C40  | 9.474367   | -0.043373 | 2.412608  | -0.460575       |
| O41  | 13.708543  | -0.249359 | -0.085140 | -0.478883       |
| C42  | -12.440048 | 2.158613  | -1.172598 | -0.475948       |
| C43  | 14.692762  | -0.921895 | 0.547426  | 0.614909        |
| C44  | 16.008876  | -0.193215 | 0.419608  | -0.529738       |
| O45  | 14.528740  | -1.972240 | 1.138714  | -0.511813       |
| C46  | 10.084774  | -2.321991 | 1.585281  | -0.456752       |
| H47  | 10.099125  | -0.571736 | -3.587253 | 0.148346        |
| H48  | -13.803474 | 0.218547  | 2.546330  | 0.156312        |
| H49  | -13.841326 | -1.316037 | 1.686835  | 0.151946        |
| H50  | -14.403640 | 1.465036  | 0.609831  | 0.145095        |

Table S3 (continued)

| Atom | X(Å)       | Y(Å)      | Z(Å)      | Mulliken Charge |
|------|------------|-----------|-----------|-----------------|
| H51  | -14.475784 | 0.455161  | -1.675405 | 0.142756        |
| H52  | -13.794013 | -1.039976 | -1.026878 | 0.140535        |
| H53  | -9.955009  | 1.793194  | -0.106942 | 0.172461        |
| H54  | -9.103037  | -1.141928 | 0.076913  | 0.154556        |
| H55  | -6.387751  | -1.434198 | -0.019798 | 0.185846        |
| H56  | -3.826811  | -0.901507 | -0.141225 | 0.168070        |
| H57  | -1.642799  | -0.742694 | -0.204468 | 0.147614        |
| H58  | -0.201502  | 1.996897  | -0.382567 | 0.149608        |
| H59  | 0.735675   | -0.926462 | -0.231225 | 0.148028        |
| H60  | 2.263850   | 1.774120  | -0.379500 | 0.144309        |
| H61  | 3.161228   | -1.160637 | -0.224402 | 0.148955        |
| H62  | 4.685342   | 1.542378  | -0.345923 | 0.139328        |
| H63  | 6.952620   | 1.603916  | -0.276869 | 0.167544        |
| H64  | 12.161616  | -0.682554 | 2.039924  | 0.152985        |
| H65  | 11.663744  | 0.760183  | 1.148499  | 0.146196        |
| H66  | 12.468787  | -1.906485 | -0.104646 | 0.163521        |
| H67  | 12.215425  | -0.683633 | -2.255580 | 0.151496        |
| H68  | 11.665210  | 0.752676  | -1.387834 | 0.156127        |
| H69  | 15.937083  | 0.790953  | 0.844409  | 0.194731        |
| H70  | 16.251037  | -0.031482 | -0.685426 | 0.192645        |
| H71  | 16.798733  | -0.773790 | 0.847265  | 0.181815        |
| H72  | -11.458779 | 0.785131  | 3.184277  | 0.161407        |
| H73  | -10.169945 | -0.204894 | 2.465994  | 0.163533        |
| H74  | -11.525891 | -0.979079 | 3.314201  | 0.160023        |
| H75  | -11.479665 | 2.572715  | -1.545132 | 0.156380        |
| H76  | -12.705364 | 2.634731  | -0.272195 | 0.156018        |
| H77  | -13.188724 | 2.454398  | -1.966370 | 0.153964        |
| H78  | -11.742443 | -1.052711 | -2.372449 | 0.151364        |
| H79  | -10.839642 | 0.446388  | -2.663129 | 0.149495        |
| H80  | -12.498204 | 0.279678  | -3.267136 | 0.148484        |
| H81  | -3.492383  | 2.900420  | 0.494014  | 0.173458        |
| H82  | -3.536658  | 2.791618  | -1.257490 | 0.173474        |
| H83  | -1.986092  | 2.992848  | -0.429867 | 0.163962        |
| H84  | 6.293689   | -2.052354 | 0.808659  | 0.176413        |
| H85  | 6.584549   | -2.121888 | -0.923192 | 0.171994        |
| H86  | 4.928613   | -2.238546 | -0.304107 | 0.168565        |
| H87  | 8.435866   | -0.364321 | 2.493130  | 0.150887        |
| H88  | 9.475577   | 1.036938  | 2.180535  | 0.147162        |
| H89  | 10.006627  | -0.232207 | 3.302124  | 0.146570        |
| H90  | 10.545226  | -2.932540 | 0.757120  | 0.170767        |
| H91  | 9.039354   | -2.636608 | 1.631450  | 0.146450        |
| H92  | 10.588870  | -2.523498 | 2.488678  | 0.142471        |
| H93  | 9.479425   | 0.807389  | -2.661884 | 0.156331        |
| H94  | 8.514541   | -0.679157 | -2.793733 | 0.161309        |
| H95  | -15.818440 | -0.954868 | 0.434846  | 0.402905        |
| H96  | 10.701651  | -2.542738 | -2.332136 | 0.409126        |

**Table S4.** Cartesian Coordinates and Mulliken Atomic Charges of the Relaxed Excited Singlet State of Peridinin in Methanol (see text).

| Atom | X(Å)       | Y(Å)      | Z(Å)      | Mulliken Charge |
|------|------------|-----------|-----------|-----------------|
| C01  | -10.118054 | 0.635324  | 0.051360  | -0.329891       |
| C02  | -9.018357  | -0.132706 | -0.009332 | -0.281481       |
| C03  | -7.642886  | 0.322912  | -0.001083 | 0.076570        |
| C04  | -6.495209  | -0.475377 | -0.052407 | -0.411696       |
| C05  | -5.356580  | 0.335641  | -0.026877 | 0.416133        |
| C06  | -4.001589  | -0.028298 | -0.051450 | -0.413546       |
| C07  | -2.843022  | 0.741703  | -0.034169 | 0.352359        |
| C08  | -1.593532  | 0.038975  | -0.056085 | -0.291214       |
| C09  | -0.342817  | 0.620131  | -0.048994 | -0.198957       |
| C10  | 0.862640   | -0.131277 | -0.062362 | -0.186896       |
| C11  | 2.124212   | 0.448587  | -0.062089 | -0.217928       |
| C12  | 3.313575   | -0.294574 | -0.068373 | -0.153863       |
| C13  | 4.588842   | 0.306702  | -0.074949 | -0.352495       |
| C14  | 5.807269   | -0.347960 | -0.072594 | 0.414478        |
| C15  | 7.011855   | 0.473110  | -0.074706 | -0.372747       |
| C16  | 8.248910   | 0.002923  | -0.077982 | -0.053555       |
| C17  | -7.194702  | 1.692476  | 0.058467  | 0.409435        |
| O18  | -7.789834  | 2.776090  | 0.116971  | -0.531566       |
| C19  | 9.481761   | -0.418177 | -0.079525 | 0.340171        |
| C20  | -2.834761  | 2.255360  | 0.006003  | -0.739602       |
| C21  | 5.964118   | -1.846824 | -0.048508 | -0.700066       |
| C22  | -11.512243 | 0.097187  | 0.024835  | 0.314514        |
| O23  | -5.799918  | 1.665559  | 0.040151  | -0.558155       |
| C24  | -12.143612 | -0.427311 | 1.279092  | 0.386352        |
| O25  | -11.617946 | -1.358564 | 0.245400  | -0.580197       |
| C26  | -11.394259 | -0.470161 | 2.591538  | -0.687538       |
| C27  | -13.657412 | -0.496957 | 1.442566  | -0.454200       |
| C28  | -14.452963 | 0.218434  | 0.347775  | 0.089764        |
| C29  | -13.825286 | 0.016413  | -1.027864 | -0.444248       |
| C30  | -12.400378 | 0.614767  | -1.129683 | 0.203450        |
| C31  | -11.795681 | 0.175230  | -2.480724 | -0.657123       |
| O32  | -15.834727 | -0.220845 | 0.365820  | -0.702286       |
| C33  | 10.210211  | -0.653416 | -1.417671 | 0.229114        |
| C34  | 9.447467   | -0.116442 | -2.634016 | -0.638297       |
| O35  | 10.328807  | -2.101724 | -1.538026 | -0.710357       |
| C36  | 11.622125  | -0.037735 | -1.368505 | -0.465299       |
| C37  | 12.389596  | -0.495811 | -0.138929 | 0.183075        |
| C38  | 11.668423  | -0.100875 | 1.145883  | -0.418667       |
| C39  | 10.237743  | -0.693511 | 1.247017  | 0.095539        |
| C40  | 9.533171   | -0.015243 | 2.441039  | -0.628776       |
| O41  | 13.682906  | 0.200340  | -0.195077 | -0.559947       |
| C42  | -12.469154 | 2.162155  | -1.084233 | -0.665964       |
| C43  | 14.800041  | -0.321098 | 0.343673  | 0.619630        |
| C44  | 15.990553  | 0.572951  | 0.162240  | -0.664415       |
| O45  | 14.814150  | -1.407770 | 0.911982  | -0.497826       |
| C46  | 10.295119  | -2.217507 | 1.529658  | -0.619304       |
| H47  | 10.013717  | -0.318985 | -3.586267 | 0.196749        |
| H48  | -13.930120 | -0.088980 | 2.356613  | 0.203458        |
| H49  | -13.929310 | -1.547704 | 1.404843  | 0.191658        |
| H50  | -14.523345 | 1.269752  | 0.521797  | 0.217404        |



Table S4 (continued)

|     |            |           |           |          |
|-----|------------|-----------|-----------|----------|
| H51 | -14.452372 | 0.484263  | -1.827450 | 0.206896 |
| H52 | -13.789364 | -1.044255 | -1.301494 | 0.186385 |
| H53 | -10.027494 | 1.700946  | 0.061125  | 0.267653 |
| H54 | -9.146991  | -1.198531 | -0.114760 | 0.248285 |
| H55 | -6.473047  | -1.542002 | -0.152384 | 0.266690 |
| H56 | -3.866650  | -1.094175 | -0.139218 | 0.228949 |
| H57 | -1.642810  | -1.035479 | -0.128077 | 0.223959 |
| H58 | -0.251616  | 1.689892  | -0.081632 | 0.229270 |
| H59 | 0.787696   | -1.204646 | -0.122282 | 0.225687 |
| H60 | 2.196287   | 1.521620  | -0.106408 | 0.227372 |
| H61 | 3.228972   | -1.364379 | -0.116800 | 0.221717 |
| H62 | 4.610573   | 1.381420  | -0.130384 | 0.230645 |
| H63 | 6.872029   | 1.539438  | -0.122249 | 0.249609 |
| H64 | 12.238059  | -0.422584 | 1.958715  | 0.219052 |
| H65 | 11.610798  | 0.981787  | 1.128066  | 0.195254 |
| H66 | 12.584431  | -1.554258 | -0.224999 | 0.243574 |
| H67 | 12.160839  | -0.313724 | -2.316803 | 0.227304 |
| H68 | 11.541224  | 1.041948  | -1.404453 | 0.200702 |
| H69 | 15.805802  | 1.522145  | 0.596857  | 0.227769 |
| H70 | 16.145374  | 0.762405  | -0.941010 | 0.227521 |
| H71 | 16.868845  | 0.113147  | 0.534703  | 0.217338 |
| H72 | -11.581357 | 0.436562  | 3.105708  | 0.193782 |
| H73 | -10.330949 | -0.571380 | 2.395711  | 0.218988 |
| H74 | -11.743483 | -1.310907 | 3.131346  | 0.194851 |
| H75 | -11.520805 | 2.605670  | -1.408572 | 0.198337 |
| H76 | -12.737632 | 2.536125  | -0.152899 | 0.189504 |
| H77 | -13.210974 | 2.516089  | -1.841044 | 0.197179 |
| H78 | -11.697252 | -0.903164 | -2.577128 | 0.194010 |
| H79 | -10.818450 | 0.613295  | -2.689891 | 0.197658 |
| H80 | -12.441492 | 0.491452  | -3.343439 | 0.188602 |
| H81 | -2.317048  | 2.609279  | 0.841819  | 0.200726 |
| H82 | -3.830039  | 2.659354  | -0.037561 | 0.264043 |
| H83 | -2.309587  | 2.654871  | -0.905563 | 0.200226 |
| H84 | 6.371518   | -2.159191 | 0.857482  | 0.217388 |
| H85 | 6.662645   | -2.165868 | -0.861765 | 0.217241 |
| H86 | 5.034928   | -2.369610 | -0.252971 | 0.211526 |
| H87 | 8.545027   | -0.427927 | 2.553945  | 0.193640 |
| H88 | 9.434926   | 1.053371  | 2.239514  | 0.188071 |
| H89 | 10.112964  | -0.177022 | 3.292743  | 0.192268 |
| H90 | 10.797272  | -2.762945 | 0.697199  | 0.221252 |
| H91 | 9.292238   | -2.618141 | 1.573032  | 0.184125 |
| H92 | 10.815795  | -2.389568 | 2.416047  | 0.182665 |
| H93 | 9.299467   | 0.952756  | -2.613900 | 0.196772 |
| H94 | 8.482513   | -0.595428 | -2.776196 | 0.207232 |
| H95 | -15.935122 | -1.145345 | 0.098815  | 0.402119 |
| H96 | 10.704805  | -2.374194 | -2.423739 | 0.424413 |

## Supporting References

1. Kusumoto, T., T. Horibe, T. Kajikawa, S. Hasegawa, T. Iwashita, R. J. Cogdell, R. R. Birge, H. A. Frank, S. Katsumura, and H. Hashimoto. 2010. Stark absorption spectroscopy of peridinin and allene-modified analogues. *Chem. Phys.* 373:71-79.
2. Premvardhan, L., E. Papagiannakis, R. G. Hiller, and R. van Grondelle. 2005. The charge-transfer character of the  $S_0 \rightarrow S_2$  transition in the carotenoid peridinin is revealed by Stark spectroscopy. *J. Phys. Chem. B.* 109:15589-15597.
